# Supplementary material for: Genotyping of Endosperms to Determine Seed Dormancy Genes Regulating Germination Through Embryonic, Endospermic, or Maternal Tissues in Rice
Source: Oxford University Press journal article supplement (doi:10.1534/g3.114.015362), 2014-12-09
Supplement: 015362_015362si.pdf [file 015362_015362si.pdf]

## **Genotyping of Endosperms to Determine Seed Dormancy Genes Regulating Germination through Embryonic, Endospermic or Maternal Tissues in Rice**

Xing-You Gu<sup>1</sup>, Jinfeng Zhang<sup>2</sup>, Heng Ye, Lihua Zhang, and Jiuhuan Feng

Plant Science Department, South Dakota State University, Brookings, SD 57007

<sup>2</sup>Present address: Plant Gene Engineering Lab, DBN Agr. Sci&Tech Research Institute, Beijing 100085, China

<sup>1</sup>Corresponding author: Xing-You Gu; mailing address: Box 2140C, Brookings, SD 57007, USA; phone: +1(605) 688-6908; fax: +1(605) 688-4452; email: [Xingyou.gu@sdstate.edu](mailto:Xingyou.gu@sdstate.edu)

**DOI: 10.1534/g3.114.015362**

**Table S1** Analysis of variance for the time period of incubation (d) required for individual seeds to germinate in the germinated subpopulation segregating for the  $SD_{7-1}$  and  $SD_{12}$  loci (refer to “ $SD_{7-1}$  &  $SD_{12}$  Ex. #1” in Table 3 for additional information)

| Source of variance        | D.F.       | SS          | MS     | F-value | Probability |
|---------------------------|------------|-------------|--------|---------|-------------|
| $SD_{12}$                 | 2          | 88.28       | 44.141 | 10.61   | <0.0001     |
| $SD_{7-1}$                | 2          | 3.77        | 1.887  | 0.45    | 0.63        |
| $SD_{12} \times SD_{7-1}$ | 4          | 18.63       | 4.657  | 1.12    | 0.34        |
| Error                     | 427        | 1777.1      | 4.162  |         |             |
| <b>Total</b>              | <b>435</b> | <b>1910</b> |        |         |             |
